# Supplementary material for: Screening of Polyvalent Phage-Resistant Escherichia coli Strains Based on Phage Receptor Analysis
Source: PubMed Central journal article supplement (PMC6499177; doi:10.3389/fmicb.2019.00850), 2019-04-18
Supplement: Data_Sheet_1.pdf [file Data_Sheet_1.pdf]

## *Supplementary Material*

# Screening of Polyvalent Phage-Resistant *Escherichia coli* Strains Based on Phage Receptor Analysis

Ping Li<sup>1,2</sup>, Hong Lin<sup>1</sup>, Zhiqiang Mi<sup>2</sup>, Shaozhen Xing<sup>2</sup>, Yigang Tong<sup>2,3\*</sup>, Jingxue Wang<sup>1\*</sup>

\* **Correspondence:** Jingxue Wang: snow@ouc.edu.cn; Yigang Tong: tong.yigang@gmail.com

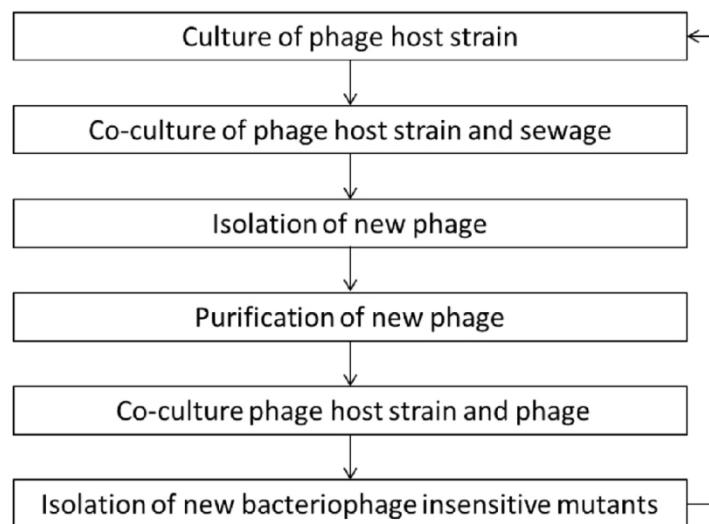

**Figure S1** Method for isolating bacteriophage insensitive mutants.

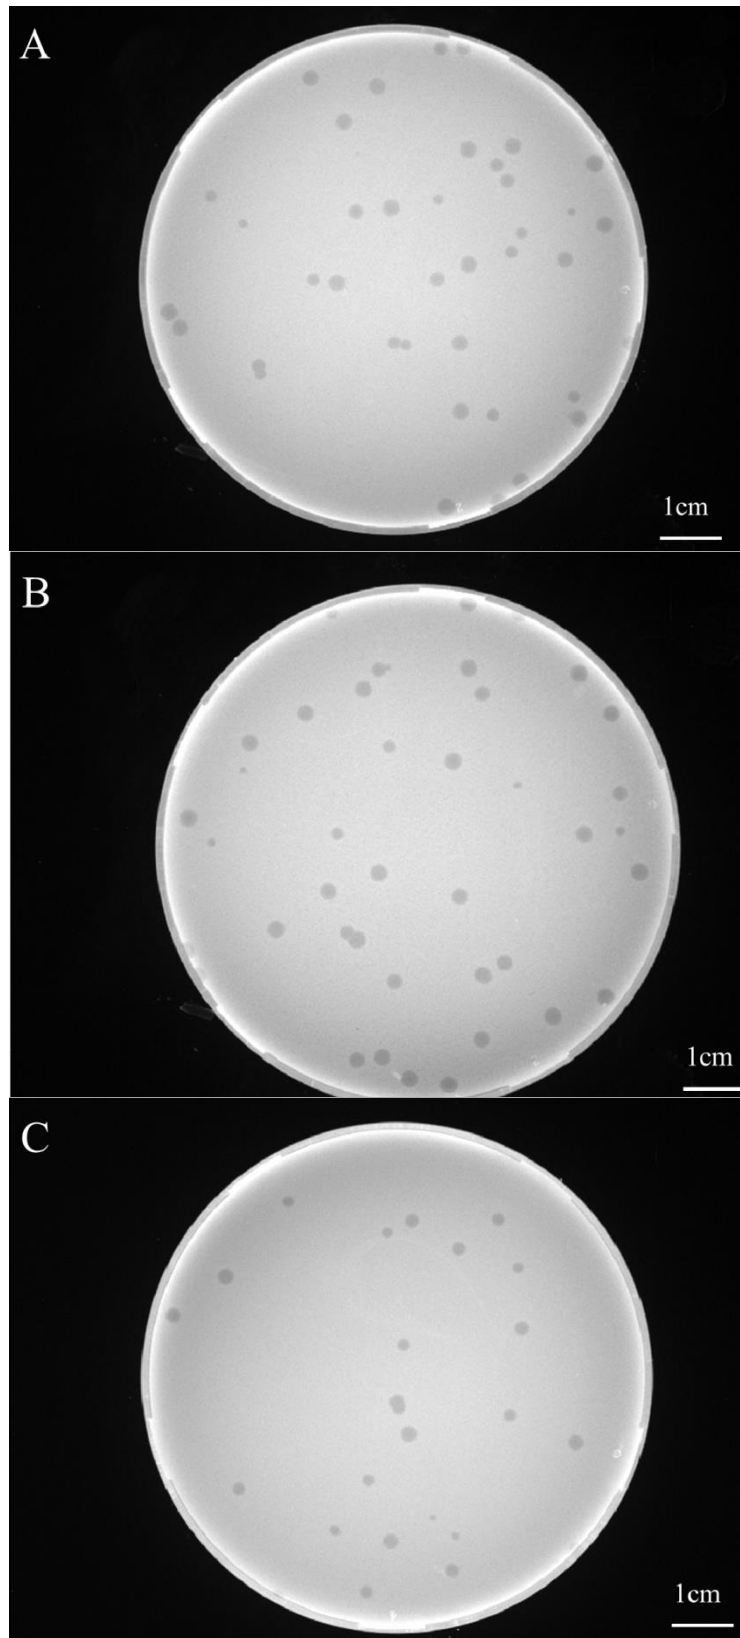

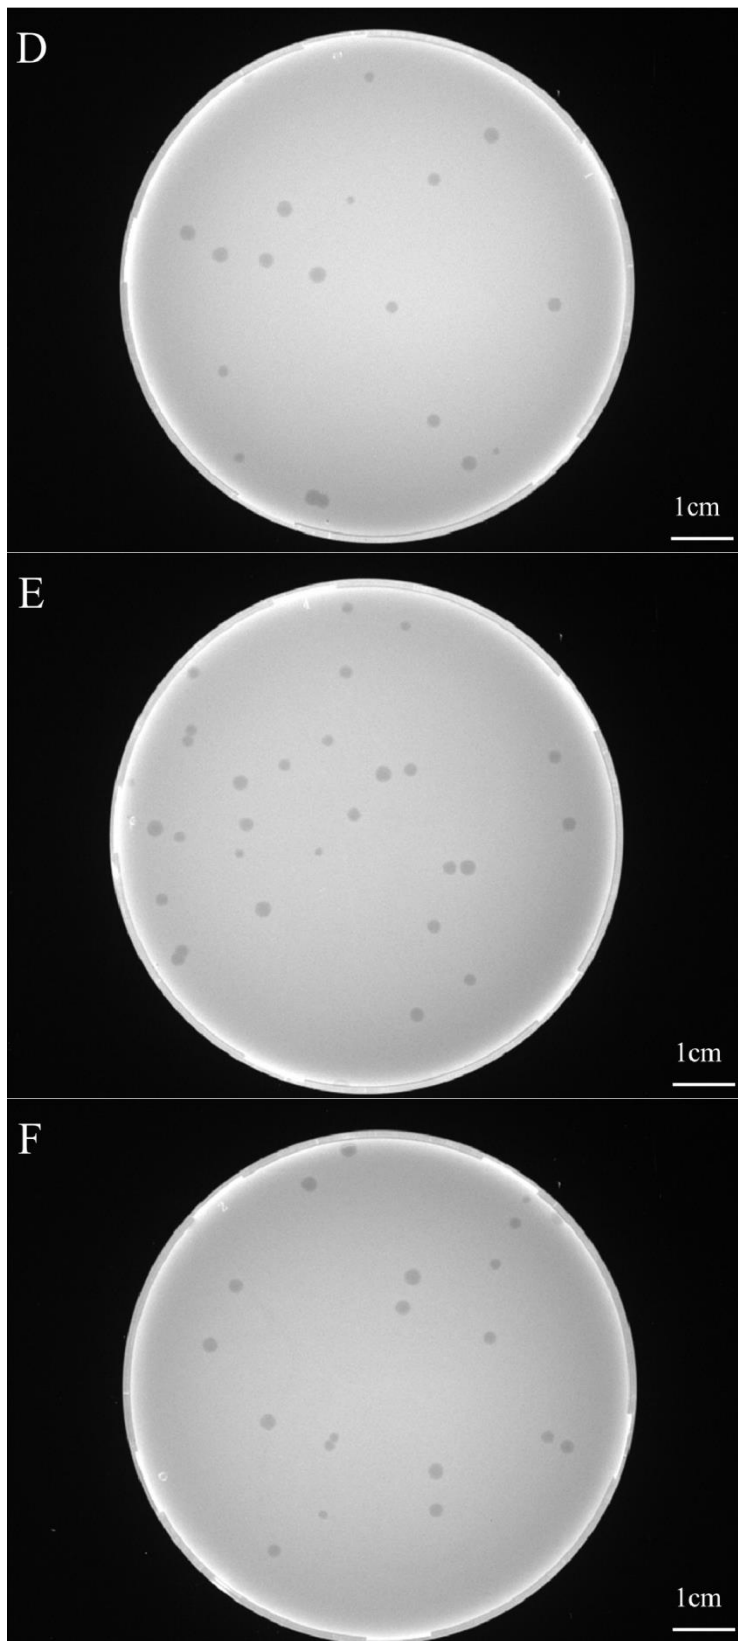

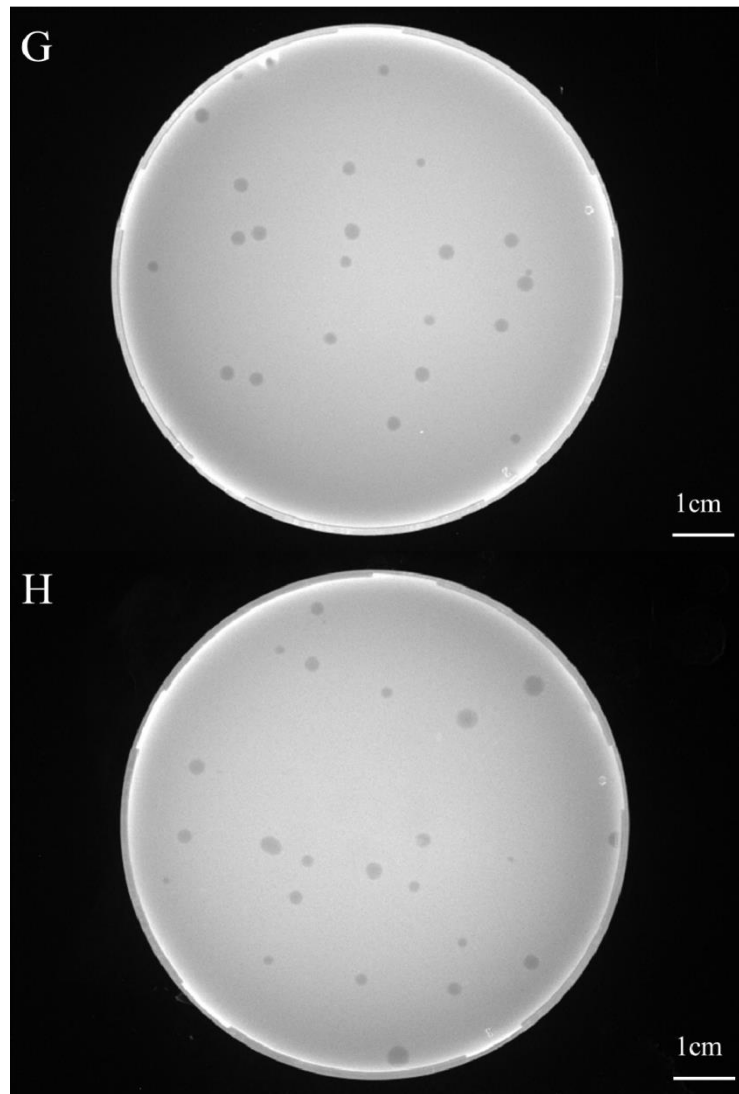

**Figure S2** Plaque morphology of phages vB\_EcoS\_IME18 (Figure S2 (A)), vB\_EcoS\_IME253 (Figure S2 (B)), vB\_EcoM\_IME281 (Figure S2 (C)), vB\_EcoM\_IME338 (Figure S2 (D)), vB\_EcoM\_IME339 (Figure S2 (E)), vB\_EcoM\_IME340 (Figure S2 (F)), vB\_EcoM\_IME341 (Figure S2 (G)), and vB\_EcoS\_IME347 (Figure S2 (H)).

**Table S1** Primers used in this study.

| <b>Primer</b> | <b>Base sequence (5'→ 3')</b>                     | <b>Description</b>                                 |
|---------------|---------------------------------------------------|----------------------------------------------------|
| pKDsg-tonB-F  | GTGCTTCTTTTGGCGGTTTCGGTTTTAGAGCTAGAA<br>ATAGCAAG  | To construct counter-selection plasmid pKDsg-tonB. |
| pKDsg-tonB-R  | CGAACCGCCAAAAGAAGCACGTGCTCAGTATCTC<br>TATCACTGA   | To construct counter-selection plasmid pKDsg-tonB. |
| pKDsg-fhuA-F  | ATCACGTTTATCGGTCGTCCGTTTTAGAGCTAGA<br>AATAGCAAG   | To construct counter-selection plasmid pKDsg-fhuA. |
| pKDsg-fhuA-R  | GGACGACCGATAAACGTGATGTGCTCAGTATCTC<br>TATCACTGA   | To construct counter-selection plasmid pKDsg-fhuA. |
| pKDsg-fepA-F  | TGCCAAATCGCCCGTGGTCGTTTTAGAGCTAGAA<br>ATAGCAAG    | To construct counter-selection plasmid pKDsg-fepA. |
| pKDsg-fepA-R  | GACCACGGGCGATTTGGCAGTGCTCAGTATCTCT<br>ATCACTGA    | To construct counter-selection plasmid pKDsg-fepA. |
| pKDsg-ompF-F  | GACTTCTTCGTTGGTTCGTGTGTTTTAGAGCTAGAA<br>ATAGCAAG  | To construct counter-selection plasmid pKDsg-ompF. |
| pKDsg-ompF-R  | ACACGACCAACGAAGAAGTCGTGCTCAGTATCTC<br>TATCACTGA   | To construct counter-selection plasmid pKDsg-ompF. |
| pKDsg-waaG-F  | CTCCGCATTGCGCCCGTGATGTTTTAGAGCTAGA<br>AATAGCAAG   | To construct counter-selection plasmid pKDsg-waaG. |
| pKDsg-waaG-R  | ATCACGGGCGCAATGCGGAGGTGCTCAGTATCTC<br>TATCACTGA   | To construct counter-selection plasmid pKDsg-waaG. |
| pKDsg-tsx-F   | AACTTCAACGTTTCGCTCTACCGTTTTAGAGCTAG<br>AAATAGCAAG | To construct counter-selection plasmid pKDsg-tsx.  |
| pKDsg-tsx-R   | GGTAGAGCGAACGTTGAAGTTGTGCTCAGTATCT<br>CTATCACTGA  | To construct counter-selection plasmid pKDsg-tsx.  |
| pKDsg-ompA-F  | TGTTTCCTACCGTTTCGGTTCGTTTTAGAGCTAGAA<br>ATAGCAAG  | To construct counter-selection plasmid pKDsg-ompA. |
| pKDsg-ompA-R  | GACCGAAACGGTAGGAAACAGTGCTCAGTATCTC<br>TATCACTGA   | To construct counter-selection plasmid pKDsg-ompA. |
| pKDsg-fadL-F  | GTCTGCTCTCGCAGTCGCAGGTTTTAGAGCTAGA                | To construct counter-selection                     |

|              |                                                                                                                               |                                                            |
|--------------|-------------------------------------------------------------------------------------------------------------------------------|------------------------------------------------------------|
|              | AATAGCAAG                                                                                                                     | plasmid pKDsg-fadL.                                        |
| pKDsg-fadL-R | CTGCGACTGCGAGAGCAGACGTGCTCAGTATCTC<br>TATCACTGA                                                                               | To construct counter-selection<br>plasmid pKDsg-fadL.      |
| gamF         | AGCATTCACTAACCCCTTTCC                                                                                                         | To construct counter-selection<br>plasmid pKDsg-xxx.       |
| gamR         | AGCTGCTGGTAGTGACGCGCCC                                                                                                        | To construct counter-selection<br>plasmid pKDsg-xxx.       |
| Oligo-tonB   | GCA TTT AAA ATC GAG ACC TGG TTT TTC TAC<br>TGA AAT GAT TAT GAC TTC AGC ATA AAG TCA<br>AAA GCC TCC GAC CGG AGG CTT TTG ACT     | Oligonucleotide for $\Delta$ <i>tonB</i><br>recombination. |
| Oligo-fhuA   | CCC GCC AGC GTT TCG AAT ATT ATC TTA TCT<br>TTA TAA TAA TCA TTC CTC TTT TGG GGC ACG<br>GAT TTC CGT GCC CAT TTC ACA AGT TGG CTG | Oligonucleotide for $\Delta$ <i>fhuA</i><br>recombination. |
| Oligo-fepA   | CGG GAT GCG TCG TGT TGA TGA CGA CCA TGC<br>CCG ACA GTT GCA ATT TAA CGT CAG ATT GTT<br>GAC AAA GTG CGC GTC GTT CAT GCC GGA TGC | Oligonucleotide for $\Delta$ <i>fepA</i><br>recombination. |
| Oligo-ompF   | CGG CAG TGG CAG GTG TCA TAA AAA AAA CCA<br>TGA GGG TAA TAA ATA TAG CAC ACC TCT TTG<br>TTA AAT GCC GAA AAA ACA GGA CTT TGG TCC | Oligonucleotide for $\Delta$ <i>ompF</i><br>recombination. |
| Oligo-tsx    | CGC CTT TTT CAC TCC CGC AAG GGA TTT TCA<br>AAC AGT GGC ATA CAT TTA TGA AAA TGC CGG<br>GAT TTA TTC CCG GCA TTT CTG ATT GTT AAC | Oligonucleotide for $\Delta$ <i>tsx</i><br>recombination.  |
| Oligo-ompA   | TGG AGA TAT TCA TGG CGT ATT TTG GAT GAT<br>AAC GAG GCG CAA AAA GTT CTC GTC TGG TAG<br>AAA AAC CCC GCT GCT GCG GGG TTT TTT TTG | Oligonucleotide for $\Delta$ <i>ompA</i><br>recombination. |
| Oligo-fadL   | CAC GTA ACA TAG TTT GTA TAA AAA TAA ATC<br>ATT GAG GTT ATG GTC TAA CAC GTT CGC CTG<br>GAT AAA GTC ACC TGC ATA GCA GGT GAC TTT | Oligonucleotide for $\Delta$ <i>fadL</i><br>recombination. |
| Oligo-waaG   | TGC TGT CGA TAA ATT ACT GCC CTC CTC CAC<br>GAC AGG TAC GTC GTT ATG GTT GAA CTT AAA<br>GAG CCG TTT GCC ACG TTA TGG CGC GGT AAA | Oligonucleotide for $\Delta$ <i>waaG</i><br>recombination. |
| tonB-F       | ATGACCCTTGATTTACCTCG                                                                                                          | Amplification of <i>tonB</i> .                             |
| tonB-R       | TTACTGAATTTCCGGTGGTGC                                                                                                         | Amplification of <i>tonB</i> .                             |
| fhuA-F       | ATGGCGCGTTCCAAAACACTGC                                                                                                        | Amplification of <i>fhuA</i> .                             |

---

|         |                                                |                                                     |
|---------|------------------------------------------------|-----------------------------------------------------|
| fhuA-R  | TTAGAAACGGAAGGTTGCGG                           | Amplification of <i>fhuA</i> .                      |
| fepA-F  | ATGAACAAGAAGATTCATTC                           | Amplification of <i>fepA</i> .                      |
| fepA-R  | TCAGAAGTGGGTGTTTACGC                           | Amplification of <i>fepA</i> .                      |
| ompF-F  | ATGATGAAGCGCAATATTC                            | Amplification of <i>ompF</i> .                      |
| ompF-R  | TTAGAACTGGTAAACGATA                            | Amplification of <i>ompF</i> .                      |
| waaG-F  | ATGATCGTTGCTTTTTGTTT                           | Amplification of <i>waaG</i> .                      |
| waaG-R  | TCAACCATCCAGACCACCCG                           | Amplification of <i>waaG</i> .                      |
| ompA-F  | ATGAAAAAGACAGCTATCG                            | Amplification of <i>ompA</i> .                      |
| ompA-R  | TTAAGCCTGCGGCTGAGTT                            | Amplification of <i>ompA</i> .                      |
| tsx-F   | ATGAAAAAACATTACTGG                             | Amplification of <i>tsx</i> .                       |
| tsx-R   | TCAGAAGTTGTAACCTACT                            | Amplification of <i>tsx</i> .                       |
| fadL-F  | ATGAGCCAGAAAACCTGT                             | Amplification of <i>fadL</i> .                      |
| fadL-R  | TCAGAACGCGTAGTTAAAG                            | Amplification of <i>fadL</i> .                      |
| tonB-CF | AGCCATATGGCTAGCATGACTATGACCCTTGATT<br>TACCTCG  | Construction of complementary plasmid pET-28a-tonB. |
| tonB-CR | TCAGCTTCCTTTTCGGGCTTTGTTACTGAATTTTCGG<br>TGGTG | Construction of complementary plasmid pET-28a-tonB. |
| fhuA-CF | AGCCATATGGCTAGCATGACTATGGCGCGTTCCA<br>AAACTGC  | Construction of complementary plasmid pET-28a-fhuA. |
| fhuA-CR | TCAGCTTCCTTTTCGGGCTTTGTTAGAACTGGTAAA<br>CGATAC | Construction of complementary plasmid pET-28a-fhuA. |
| fepA-CF | AGCCATATGGCTAGCATGACTATGAACAAGAAG<br>ATTCATTC  | Construction of complementary plasmid pET-28a-fepA. |
| fepA-CR | TCAGCTTCCTTTTCGGGCTTTGTCAGAAGTGGGTGT<br>TTACGC | Construction of complementary plasmid pET-28a-fepA. |
| ompF-CF | AGCCATATGGCTAGCATGACTATGATGAAGCGCA             | Construction of complementary                       |

---

---

|         | ATATTCT                                        | plasmid pET-28a-ompF.                                  |
|---------|------------------------------------------------|--------------------------------------------------------|
| ompF-CR | TCAGCTTCCTTTTCGGGCTTTGTTAGAAACGGAAG<br>GTTGCGG | Construction of complementary<br>plasmid pET-28a-ompF. |
| tsx-CF  | AGCCATATGGCTAGCATGACTATGAAAAAACAT<br>TACTGG    | Construction of complementary<br>plasmid pET-28a-tsx.  |
| tsx-CR  | TCAGCTTCCTTTTCGGGCTTTGTCAGAAGTTGTAAC<br>CTACT  | Construction of complementary<br>plasmid pET-28a-tsx.  |
| ompA-CF | AGCCATATGGCTAGCATGACTATGAAAAAGACA<br>GCTATCG   | Construction of complementary<br>plasmid pET-28a-ompA. |
| ompA-CR | TCAGCTTCCTTTTCGGGCTTTGTTAAGCCTGCGGCT<br>GAGTT  | Construction of complementary<br>plasmid pET-28a-ompA. |
| fadL-CF | AGCCATATGGCTAGCATGACTATGAGCCAGAAAA<br>CCCTGT   | Construction of complementary<br>plasmid pET-28a-fadL. |
| fadL-CR | TCAGCTTCCTTTTCGGGCTTTGTCAGAACGCGTAGT<br>TAAAGT | Construction of complementary<br>plasmid pET-28a-fadL. |
| egfp-F  | AGTCATGCTAGCCATATGGCT<br>ATGGTGAGCAAGGGCGAG    | Construction of recombinant<br>plasmid pET-28a-egfp.   |
| egfp-R  | CAAAGCCCGAAAGGAAGCTGA<br>TGGACGAGCTGTACAAGTAA  | Construction of recombinant<br>plasmid pET-28a-egfp.   |
| pET-F   | AGTCATGCTAGCCATATGGCT                          | Construction of complementary<br>plasmid pET-28a-xxx.  |
| pET-R   | CAAAGCCCGAAAGGAAGCTGA                          | Construction of complementary<br>plasmid pET-28a-xxx.  |

---



**Table S2** Gene variations present in bacteriophage-insensitive mutants.

| <b>Bacteriophage insensitive mutants</b> | <b>Reference position change</b> | <b>Annotations</b> | <b>Coding region change</b> | <b>Amino acid change</b> |
|------------------------------------------|----------------------------------|--------------------|-----------------------------|--------------------------|
| 18-R1                                    | 172350_172439del                 | <i>fhuA</i>        | 2024_2112del                | Ser675_Trp704del         |
| 18-R2                                    | 170327_172570del                 | <i>fhuA</i>        | 1886_1907del                | Thr629fs                 |
| 18-R3                                    | 171881_171882insA                | <i>fhuA</i>        | 1554_1555ins                | Phe519fs                 |
| 253-R1                                   | 570740_572980del                 | <i>fepA</i>        | 1_2241del                   | Met1_Ter747del           |
| 253-R2                                   | 570740_572980del                 | <i>fepA</i>        | 1_2241del                   | Met1_Ter 747del          |
| 253-R3                                   | 570740_572980del                 | <i>fepA</i>        | 1_2241del                   | Met1_Ter 747del          |
| 281-R1                                   | 991689_991835del                 | <i>ompF</i>        | 238_384del                  | Tyr79_Val1128del         |
| 281-R2                                   | 991689_991845del                 | <i>ompF</i>        | 238_374del                  | Asp76fs                  |
| 281-R3                                   | 990984_992072del                 | <i>ompF</i>        | 1_1089del                   | Met1_Ter363del           |
| 338-R1                                   | 3673550_3673567del               | <i>waaG</i>        | 296_313del                  | Ala99_Ala104del          |
| 338-R2                                   | 3673567T>G                       | <i>waaG</i>        | 236A>C                      | Ala235Pro                |
| 338-R3                                   | 3673159                          | <i>waaG</i>        | 704G>T                      | Gly235Val                |
| 339-R1                                   | 397362insT                       | <i>tsx</i>         | 53_54 ins                   | Phe18fs                  |
| 339-R2                                   | 396969A>T                        | <i>tsx</i>         | 446T>A                      | Leu149Glu                |
| 339-R3                                   | 3976530_397414del                | <i>tsx</i>         | 1_885del                    | Met1_Ter295del           |
| 340-R1                                   | 1024774_1024778del               | <i>ompA</i>        | 365_369del                  | Val122fs                 |
| 340-R2                                   | 1024102_1025142del               | <i>ompA</i>        | 1_1041del                   | Met1_Ter347del           |
| 340-R3                                   | 1025031                          | <i>ompA</i>        | 112C>T                      | Gln38Ter                 |
| 341-R1                                   | 2349673_2349971del               | <i>fadL</i>        | 1043_1341del                | Asp34Ter                 |

## Supplementary Material

---

|        |                    |             |           |                |
|--------|--------------------|-------------|-----------|----------------|
| 341-R2 | 2349112T>G         | <i>fadL</i> | 482T>G    | Leu161Val      |
| 341-R3 | 2349811T>A         | <i>fadL</i> | 1181T>A   | Leu394Glu      |
| 347-R1 | 1475026_1477128del | <i>yncD</i> | 1_2103del | Met1_Ter701del |
| 347-R2 | 1475026_1477128del | <i>yncD</i> | 1_2103del | Met1_Ter701del |
| 347-R3 | 1475026_1477128del | <i>yncD</i> | 1_2103del | Met1_Ter701del |

---

**Table S3** Gene variations present in *E. coli* strain PR8.

| Reference position | Annotations | Coding region change | Amino acid change |
|--------------------|-------------|----------------------|-------------------|
| 171565_171570del   | <i>fhuA</i> | 1239_1244delTATGCG   | Met416_Arg417del  |
| 3673567T>G         | <i>waaG</i> | 236A>C               | Ala235Pro         |
| 991689_991841del   | <i>ompF</i> | 232_384del           | Thr77_Tyr128del   |
| 1025046T>A         | <i>ompA</i> | 97A>T                | Lys33Ter          |
| 2348631_2349971del | <i>fadL</i> | 1_1341del            | Met1_Ter447del    |
| 396902C>T          | <i>tsx</i>  | 513G>A               | Trp171Ter         |
| 1476453_127656del  | <i>yncD</i> | 673_676delCTGG       | Leu225fs          |
| 4307613C>G         | <i>hflX</i> | 422C>G               | Thr141Ser         |
| 568322_568474del   | <i>hokE</i> | 1_153del             | Met1_Ter51del     |
| 569945_570574del   | <i>entD</i> | 1_630del             | Met1_Ter210del    |
| 570740_572980del   | <i>fepA</i> | 1_2241del            | Met1_Ter747del    |
| 570740_572980del   | <i>fes</i>  | 1_1230del            | Met1_Ter410del    |
| 574429_574647del   | <i>ybdZ</i> | 1_219del             | Met1_Ter73del     |
| 574644_578525del   | <i>entF</i> | 1_3882del            | Met1_Ter1294del   |
| 578741_579874del   | <i>fepE</i> | 1_1134del            | Met1_Ter377del    |
| 579871_580686del   | <i>fepC</i> | 1_816del             | Met1_Ter272del    |
| 580683_581675del   | <i>fepG</i> | 1_993del             | Met1_Ter331del    |
| 581672_582676del   | <i>fepD</i> | 1_1005del            | Met1_Ter335del    |

**Table S4** The identity of phages to which *E. coli* strain PR8 was resistant.

| <i>Myoviridae,</i><br><i>Tevenvirinae</i><br><b>phages</b>   | IME339<br>( query<br>cover,<br>ident) | IME340<br>( query<br>cover,<br>ident) | IME341<br>( query<br>cover,<br>ident) | IME391<br>( query<br>cover,<br>ident) | IME361<br>( query<br>cover,<br>ident) | IME362<br>( query<br>cover,<br>ident) | IME412<br>( query<br>cover,<br>ident) |
|--------------------------------------------------------------|---------------------------------------|---------------------------------------|---------------------------------------|---------------------------------------|---------------------------------------|---------------------------------------|---------------------------------------|
| IME281                                                       | 15%,<br>79.57%                        | 14%,<br>81.08%                        | 90%,<br>93.99%                        | 17%,<br>77.35%                        | 20%,<br>84.76%                        | 16%,<br>80.87%                        | 87%,<br>95.74%                        |
| IME339                                                       |                                       | 92%,<br>96.86%                        | 18%,<br>81.48%                        | 89%,<br>96.81%                        | 37%,<br>79.58%                        | 46%,<br>79.68%                        | 16%,<br>79.77%                        |
| IME340                                                       |                                       |                                       | 14%,<br>81.78%                        | 91%,<br>97.45%                        | 45%,<br>79.91%                        | 49%,<br>80%                           | 13%,<br>81.01%                        |
| IME341                                                       |                                       |                                       |                                       | 17%,<br>81.47%                        | 16%,<br>80.46%                        | 14%,<br>81.29%                        | 89%,<br>96.38%                        |
| IME391                                                       |                                       |                                       |                                       |                                       | 41%,<br>75.18%                        | 44%,<br>75.35%                        | 16%,<br>81.48%                        |
| IME361                                                       |                                       |                                       |                                       |                                       |                                       | 90%,<br>97.32%                        | 18%,<br>74.91%                        |
| IME362                                                       |                                       |                                       |                                       |                                       |                                       |                                       | 13%,<br>80.17%                        |
| <i>Siphoviridae,</i><br><i>Tunavirinae,</i><br><b>phages</b> | JMPW1<br>( query<br>cover,<br>ident)  | IME18<br>( query<br>cover,<br>ident)  | IME167<br>( query<br>cover,<br>ident) | IME253<br>( query<br>cover,<br>ident) | IME347<br>( query<br>cover,<br>ident) |                                       |                                       |
| T1                                                           | 88%,<br>95.76%                        | 89%,<br>93.00%                        | 89%,<br>94.96%                        | 2%,<br>86.80%                         | 13%,<br>74.98%                        |                                       |                                       |
| JMPW1                                                        |                                       | 97%,<br>93.79%                        | 100%,<br>99.94%                       | 0%,<br>96.92%                         | 10%,<br>78.36%                        |                                       |                                       |

---

|                                                                 |                             |                             |                             |                             |                |
|-----------------------------------------------------------------|-----------------------------|-----------------------------|-----------------------------|-----------------------------|----------------|
|                                                                 | IME18                       |                             | 96%,<br>92.51%              | 0%,<br>96.92%               | 0%,<br>77.81%  |
|                                                                 |                             | IME167                      |                             | 0%,<br>96.92%               | 10%,<br>78.32% |
|                                                                 |                             |                             | IME253                      |                             | 0%,<br>97.01%  |
| <i>Ackermannviridae,</i><br><i>Cvivirinae,</i><br><b>phages</b> | IME366                      | IME371                      | IME375                      | IME377                      |                |
|                                                                 | ( query<br>cover,<br>ident) | ( query<br>cover,<br>ident) | ( query<br>cover,<br>ident) | ( query<br>cover,<br>ident) |                |
| IME360                                                          | 3%,<br>80.69%               | 0%,<br>0%,                  | 0%,<br>0%,                  | 0%,<br>80.69%               |                |
|                                                                 | IME366                      | 91%,<br>98.72%              | 92%,<br>99.24%              | 97%,<br>99.33%              |                |
|                                                                 | IME371                      |                             | 91%,<br>98.47%              | 90%,<br>98.27%              |                |
|                                                                 |                             | IME375                      |                             | 93%,<br>98.23%              |                |
| <i>Myoviridae,</i><br><i>Ounavirina,</i><br><b>phages</b>       | IME364                      | IME365                      |                             |                             |                |
|                                                                 | ( query<br>cover,<br>ident) | ( query<br>cover,<br>ident) |                             |                             |                |
| IME338                                                          | 89%,<br>94.44%              | 88%,<br>94.49%              |                             |                             |                |
|                                                                 | IME364                      | 97%,<br>97.49%              |                             |                             |                |

---
